# Supplementary material for: 5-HT4 Receptors Are Not Involved in the Effects of Fluoxetine in the Corticosterone Model of Depression
Source: PubMed Central journal article supplement (PMC8459452; doi:10.1021/acschemneuro.1c00158), 2021-05-11
Supplement: cn1c00158_si_001.pdf [file cn1c00158_si_001.pdf]

## 5-HT<sub>4</sub> Receptors Are Not Involved in the Effects of Fluoxetine in the Corticosterone Model of Depression

### Authors

Josep Amigo<sup>a,b</sup>, Emilio Garro-Martinez<sup>a,b,1</sup>, Rebeca Vidal Casado<sup>c,d</sup>, Valerie Compan<sup>e</sup>, Fuencisla Pilar-Cuéllar<sup>a,b</sup>, Angel Pazos<sup>a,b</sup>, Alvaro Díaz<sup>a,b,\*</sup>, Elena Castro<sup>a,b,\*</sup>

### Affiliations:

<sup>a</sup>Instituto de Biomedicina y Biotecnología de Cantabria, IBBTEC (Universidad de Cantabria, CSIC, SODERCAN), Departamento de Fisiología y Farmacología, Universidad de Cantabria, 39011 Santander, Spain

<sup>b</sup>Centro de Investigación Biomédica en Red de Salud Mental (CIBERSAM), Instituto de Salud Carlos III, Spain

<sup>c</sup>Departamento de Farmacología, Facultad de Medicina, Universidad Complutense, Instituto de Investigación Sanitaria del Hospital Clínico San Carlos (IdISSC), Spain

<sup>d</sup>Red de Trastornos Adictivos del Instituto de Salud Carlos III, Madrid, Spain

<sup>e</sup>University of Nîmes, Site CARMES, 30 000 Nîmes, France

<sup>1</sup>Present address: Department of Integrative Medical Biology (IMB). Umeå universitet, 901 87 Umeå, Sweden.

## SUPPLEMENTARY INFORMATION

Table S1. Statistical analysis report (Behavioural studies)

| Measurement                            | Three-way ANOVA              | F(DFn, DFd)        | <i>p</i> |
|----------------------------------------|------------------------------|--------------------|----------|
| Central time OF<br>(Fig 1A)            | Genotype                     | F (1,71) = 37.90   | < 0.001  |
|                                        | Model                        | F (1,71) = 19.55   | < 0.001  |
|                                        | Treatment                    | F (1,71) = 29.29   | < 0.001  |
|                                        | Genotype x model             | F (1,71) = 0.4973  | 0.4830   |
|                                        | Genotype x treatment         | F (1,71) = 1.601   | 0.2098   |
|                                        | Model x treatment            | F (1,71) = 0.07886 | 0.7797   |
|                                        | Genotype x model x treatment | F (1,71) = 0.5802  | 0.4488   |
| Central entries OF<br>(Fig 1B)         | Genotype                     | F (1,71) = 34.95   | < 0.001  |
|                                        | Model                        | F (1,71) = 16.53   | < 0.001  |
|                                        | Treatment                    | F (1,71) = 49.61   | < 0.001  |
|                                        | Genotype x model             | F (1,71) = 0.5923  | 0.4441   |
|                                        | Genotype x treatment         | F (1,71) = 2.451   | 0.1219   |
|                                        | Model x treatment            | F (1,71) = 0.2150  | 0.6443   |
|                                        | Genotype x model x treatment | F (1,71) = 0.07437 | 0.7859   |
| Total distance OF<br>(Fig 1C)          | Genotype                     | F (1,71) = 7.905   | < 0.01   |
|                                        | Model                        | F (1,71) = 0.9031  | 0.3452   |
|                                        | Treatment                    | F (1,71) = 5.974   | < 0.05   |
|                                        | Genotype x model             | F (1,71) = 1.812   | 0.1825   |
|                                        | Genotype x treatment         | F (1,71) = 0.8859  | 0.3498   |
|                                        | Model x treatment            | F (1,71) = 5.029   | < 0.05   |
|                                        | Genotype x model x treatment | F (1,71) = 1.09    | 0.2958   |
| NSF: Latency to<br>feeding<br>(Fig 2A) | Genotype                     | F (1,66) = 66.33   | < 0.001  |
|                                        | Model                        | F (1,66) = 2.622   | 0.1102   |
|                                        | Treatment                    | F (1,66) = 121.9   | < 0.001  |
|                                        | Genotype x model             | F (1,66) = 0.08871 | 0.7668   |
|                                        | Genotype x treatment         | F (1,66) = 22.67   | < 0.001  |
|                                        | Model x treatment            | F (1,66) = 1.027   | 0.3146   |
|                                        | Genotype x model x treatment | F (1,66) = 0.1357  | 0.7138   |
| NSF: post-test<br>(Fig 2B)             | Genotype                     | F (1,66) = 22.86   | < 0.001  |
|                                        | Model                        | F (1,66) = 0.07228 | 0.7889   |
|                                        | Treatment                    | F (1,66) = 0.3263  | 0.5698   |
|                                        | Genotype x model             | F (1,66) = 1.282   | 0.2617   |
|                                        | Genotype x treatment         | F (1,66) = 0.5513  | 0.4604   |
|                                        | Model x treatment            | F (1,66) = 0.01606 | 0.8995   |
|                                        | Genotype x model x treatment | F (1,66) = 0.1285  | 0.7211   |

**Table S2. Statistical analysis report (Biochemical studies)**

| Measurement                                                          | Three-way ANOVA              | F(DFn, DFd)         | <i>p</i> |
|----------------------------------------------------------------------|------------------------------|---------------------|----------|
| [ <sup>35</sup> S]GTP <sub>γ</sub> S<br>Binding:<br>DRN<br>(Table 1) | Genotype                     | F (1,49) = 14.92    | < 0.001  |
|                                                                      | Model                        | F (1,49) = 0.09444  | 0.7599   |
|                                                                      | Treatment                    | F (1,49) = 1.134    | 0.2922   |
|                                                                      | Genotype x model             | F (1,49) = 7.159    | < 0.05   |
|                                                                      | Genotype x treatment         | F (1,49) = 4.245    | < 0.05   |
|                                                                      | Model x treatment            | F (1,49) = 3.946    | 0.0526   |
|                                                                      | Genotype x model x treatment | F (1,49) = 0.01559  | 0.9011   |
| [ <sup>35</sup> S]GTP <sub>γ</sub> S<br>Binding:<br>CA1<br>(Table 1) | Genotype                     | F (1,42) = 6.942    | < 0.05   |
|                                                                      | Model                        | F (1,42) = 3.465    | 0.0697   |
|                                                                      | Treatment                    | F (1,42) = 38.07    | < 0.001  |
|                                                                      | Genotype x model             | F (1,42) = 0.3839   | 0.5389   |
|                                                                      | Genotype x treatment         | F (1,42) = 3.860    | 0.0561   |
|                                                                      | Model x treatment            | F (1,42) = 0.002648 | 0.9592   |
|                                                                      | Genotype x model x treatment | F (1,42) = 3.345    | 0.0745   |
| [ <sup>35</sup> S]GTP <sub>γ</sub> S<br>Binding:<br>CA3<br>(Table 1) | Genotype                     | F (1,43) = 1.272    | 0.2656   |
|                                                                      | Model                        | F (1,43) = 0.1884   | 0.6664   |
|                                                                      | Treatment                    | F (1,43) = 0.4618   | 0.5004   |
|                                                                      | Genotype x model             | F (1,43) = 0.9209   | 0.3426   |
|                                                                      | Genotype x treatment         | F (1,43) = 2.187    | 0.1465   |
|                                                                      | Model x treatment            | F (1,43) = 0.7414   | 0.3940   |
|                                                                      | Genotype x model x treatment | F (1,43) = 0.6122   | 0.4382   |
| [ <sup>35</sup> S]GTP <sub>γ</sub> S<br>Binding:<br>DG<br>(Table 1)  | Genotype                     | F (1,43) = 27.27    | < 0.001  |
|                                                                      | Model                        | F (1,43) = 1.560    | 0.2184   |
|                                                                      | Treatment                    | F (1,43) = 3.746    | 0.0595   |
|                                                                      | Genotype x model             | F (1,43) = 1.630    | 0.2086   |
|                                                                      | Genotype x treatment         | F (1,43) = 22.67    | < 0.001  |
|                                                                      | Model x treatment            | F (1,43) = 3.476    | 0.0691   |
|                                                                      | Genotype x model x treatment | F (1,43) = 6.050    | < 0.05   |

| Measurement              | Three-way ANOVA              | F(DFn, DFd)        | <i>p</i> |
|--------------------------|------------------------------|--------------------|----------|
| BDNF<br>CA1<br>(Table 2) | Genotype                     | F (1,53) = 1.367   | 0.2479   |
|                          | Model                        | F (1,53) = 40.78   | < 0.001  |
|                          | Treatment                    | F (1,53) = 1.892   | 0.1748   |
|                          | Genotype x model             | F (1,53) = 0.2857  | 0.5952   |
|                          | Genotype x treatment         | F (1,53) = 0.9878  | 0.3248   |
|                          | Model x treatment            | F (1,53) = 0.2052  | 0.6524   |
|                          | Genotype x model x treatment | F (1,53) = 0.02495 | 0.8751   |
| BDNF<br>CA3<br>(Table 2) | Genotype                     | F (1,61) = 1.272   | 0.7171   |
|                          | Model                        | F (1,61) = 0.1884  | 0.1942   |
|                          | Treatment                    | F (1,61) = 0.4618  | 0.7684   |
|                          | Genotype x model             | F (1,61) = 0.9209  | 0.5892   |
|                          | Genotype x treatment         | F (1,61) = 2.187   | 0.4827   |
|                          | Model x treatment            | F (1,61) = 0.7414  | 0.3613   |
|                          | Genotype x model x treatment | F (1,61) = 0.6122  | 0.8092   |
| BDNF<br>DG<br>(Table 2)  | Genotype                     | F (1,54) = 27.16   | < 0.001  |
|                          | Model                        | F (1,54) = 11.31   | < 0.01   |
|                          | Treatment                    | F (1,54) = 11.63   | < 0.01   |
|                          | Genotype x model             | F (1,54) = 0.5552  | 0.4594   |
|                          | Genotype x treatment         | F (1,54) = 19.44   | < 0.001  |
|                          | Model x treatment            | F (1,54) = 3.206   | 0.0790   |
|                          | Genotype x model x treatment | F (1,54) = 3.935   | 0.0524   |
